# Supplementary material for: In vivo RNAi screen identifies NLK as a negative regulator of mesenchymal activity in glioblastoma
Source: PubMed Central journal article supplement (PMC4652994; doi:10.18632/oncotarget.3980), 2015-05-19
Supplement: oncotarget-06-20145-s001.pdf [file oncotarget-06-20145-s001.pdf]

SUPPLEMENTARY FIGURES AND TABLES

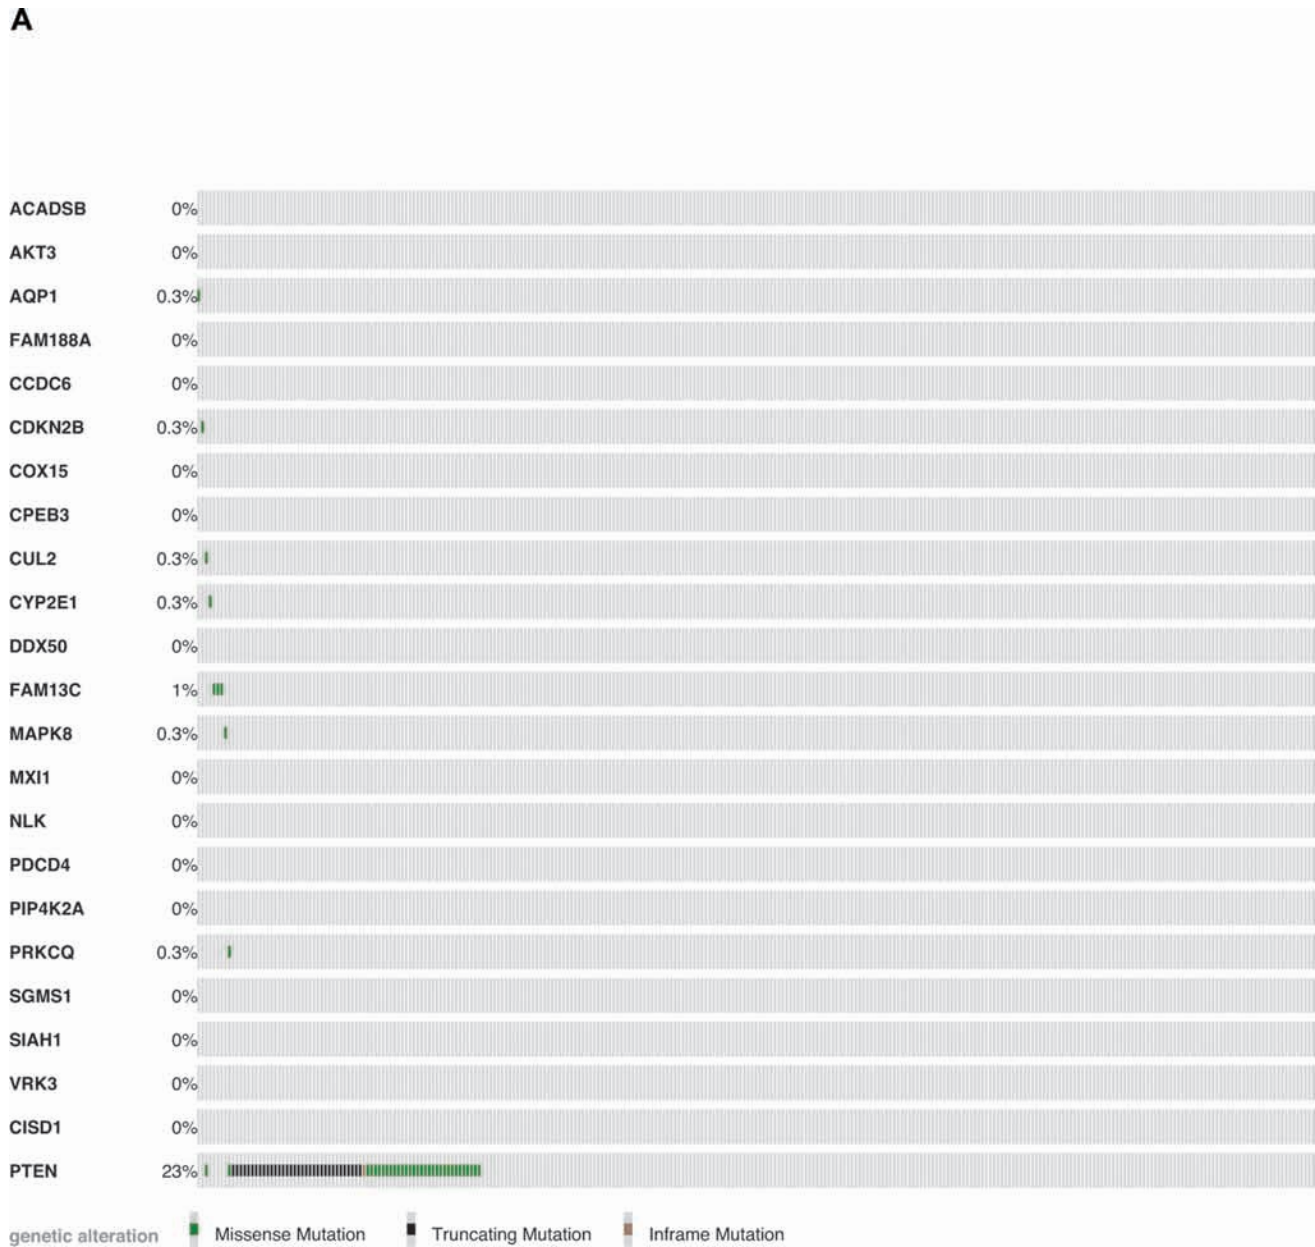

**Supplementary Figure S1: A list of reported frequency of somatic mutations in GBM. A.** Reported frequency of somatic mutations of our candidate tumor suppressor genes that are found in TCGA GBM from cBioportal public database.

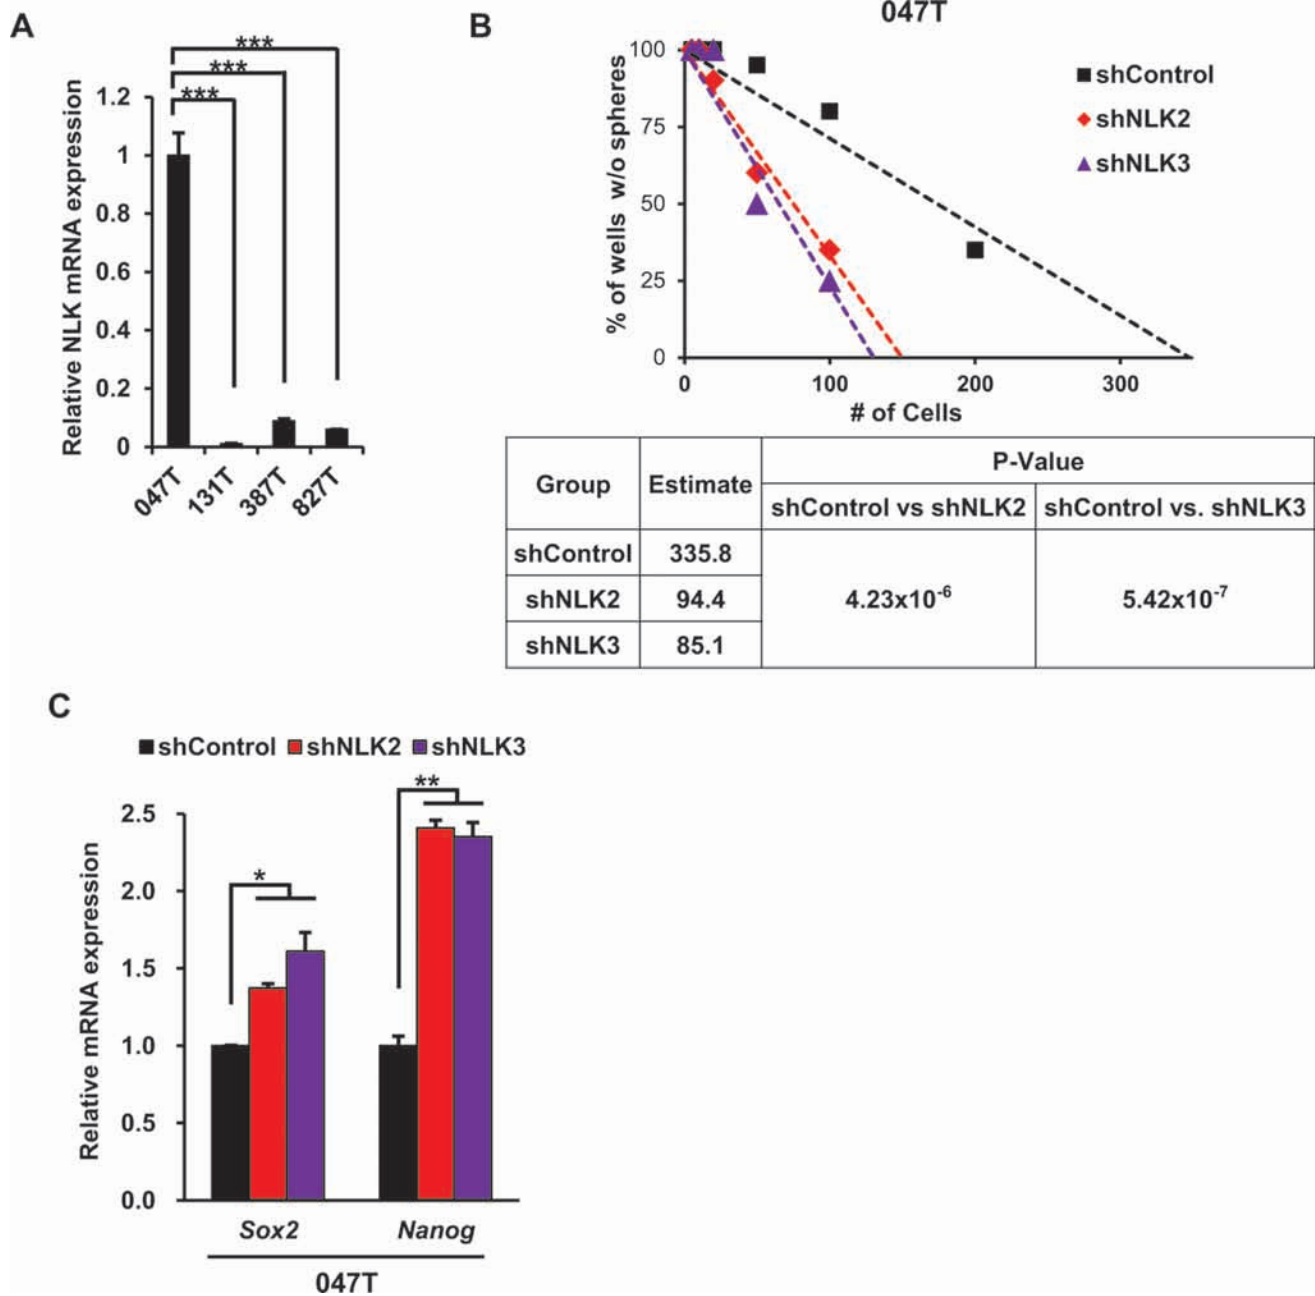

**Supplementary Figure S2: Proliferation and clonogenic growth of GBM cells in the presence of shRNA-mediated NLK knockdown.** **A.** Real-time RT-PCR analysis of NLK mRNA expression in different GBM cells. **B.** Limiting dilution assays (LDA) for *in vitro* tumor sphere formation. Primary GBM tumor cells were transduced with shControl, shNLK2, or shNLK3 vectors and plated into 96-well plates with various seeding densities (1–50 cells per well) for sphere formation. LDA clonogenic significance is measured by the linear regression analysis. **C.** Real-time PCR analysis of stem cell associated transcription factors (Sox2 and Nanog).

A

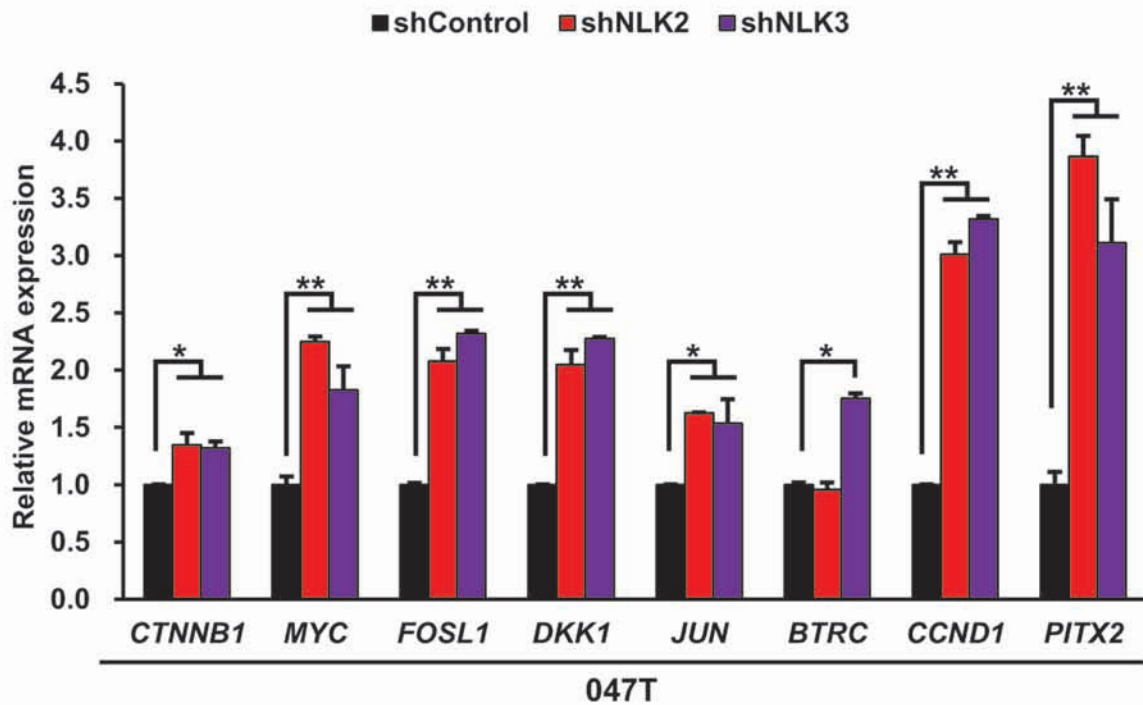

B

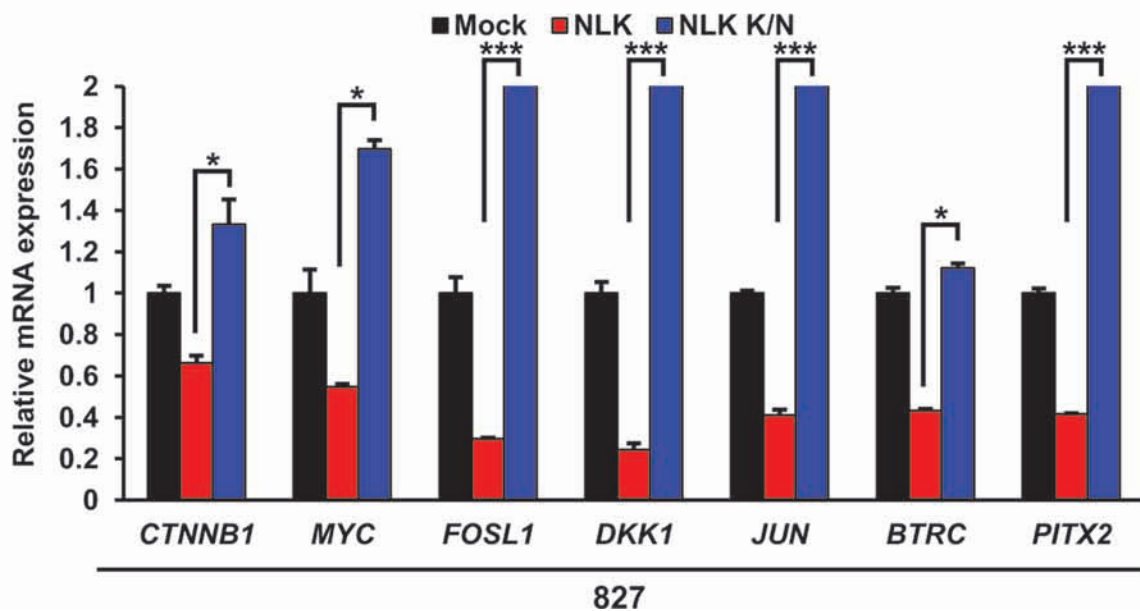

**Supplementary Figure S3: Analysis of Wnt target genes.** A. Real-time PCR analysis to determine the effects of shNLK on mRNA expression levels of beta-catenin and its downstream target genes (*MYC*, *FOSL1*, *DKK1*, *JUN*, *BTRC*, and *PITX2*), (+ SD,  $n = 2$ ). B. Real-time PCR analysis to determine the effects of NLK K/N on mRNA expression levels of beta-catenin and its downstream target genes (*MYC*, *FOSL1*, *DKK1*, *JUN*, *BTRC*, and *PITX2*), (+ SD,  $n = 2$ ).

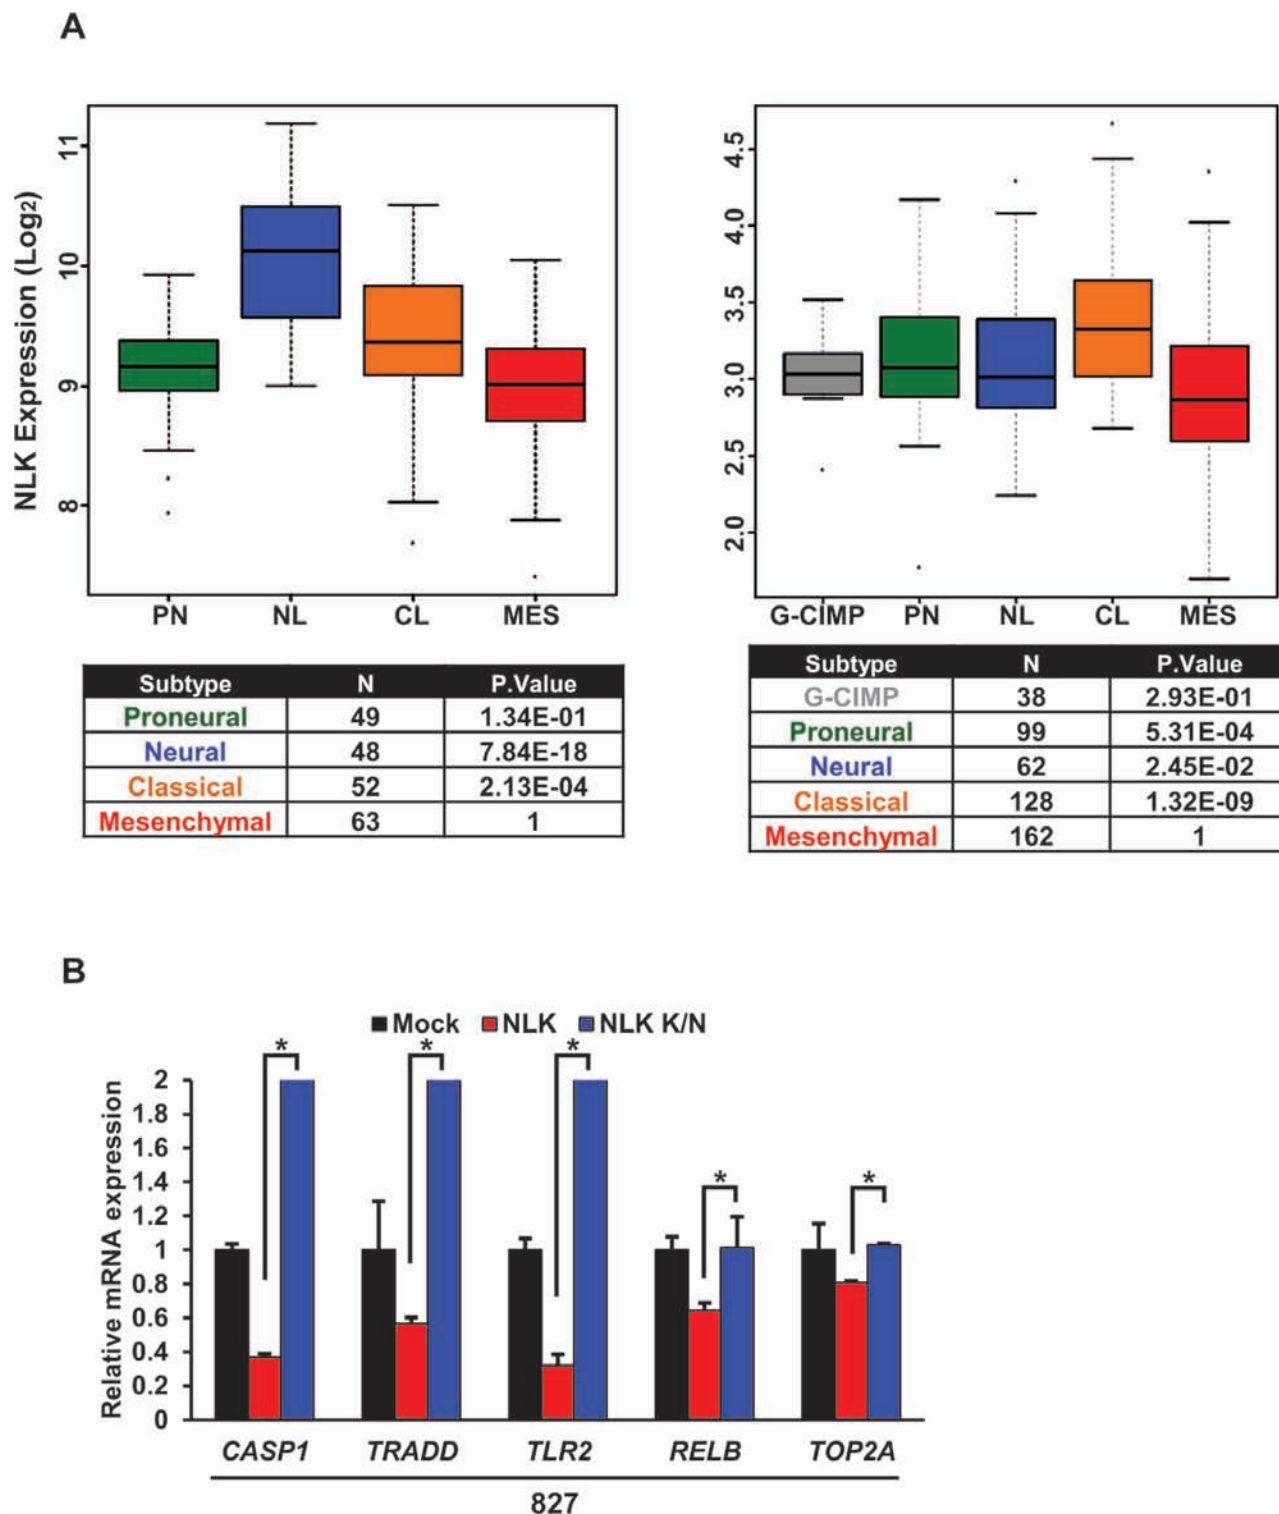

**Supplementary Figure S4: GBM subtype classification according to NLK mRNA expression.** A. Rembrandt microarray data analysis of NLK expression according to four different GBM subtype classification. (PN: Proneural, NL: Neural, CL: Classical, MES: Mesenchymal) and TCGA RNA-seq data analysis of NLK expression according to different GBM subtype classification and G-CIMP group. B. Real-time PCR analysis to determine the effects of NLK K/N on mRNA expression levels of mesenchymal associated genes (CASP1, TRADD, TLR2, RELB, TOP2A), (+ SD,  $n = 2$ ).

**Supplementary Table S1. A list of the shRNA pool**A. List of shRNA target genes that were used in our *in vivo* RNAi screen.

| Gene Symbol | Location  | Gene Full Name                                                          |
|-------------|-----------|-------------------------------------------------------------------------|
| ACADB       | 10q26.13  | Acyl-CoA dehydrogenase, short/branched chain                            |
| AKT3        | 1q44      | v-akt murine thymoma viral oncogene homolog 3 (protein kinase B, gamma) |
| AQP1        | 7p14      | Aquaporin 1                                                             |
| FAM188A     | 10p13     | Family with sequence similarity 188, member A                           |
| CCDC6       | 10q21     | Coiled-coil domain containing 6                                         |
| CDKN2B      | 9p21      | Cyclin-dependent kinase inhibitor 2B (p15, inhibits CDK4)               |
| COX15       | 10q24     | COX15 homolog, cytochrome c oxidase assembly protein                    |
| CPEB3       | 10q23.32  | Cytoplasmic polyadenylation element binding protein 3                   |
| CUL2        | 10q11.21  | Cullin 2                                                                |
| CYP2E1      | 10q23.32  | Cytochrome P450, family 2, subfamily E, polypeptide                     |
| DDX50       | 10q22.1   | DEAD (Asp-Glu-Ala-Asp) box polypeptide                                  |
| FAM13C      | 10q21.1   | Family with sequence similarity 13, member C                            |
| MAPK8       | 10q11.22  | Mitogen-activated protein kinase 8                                      |
| MXI1        | 10q24-q25 | MAX interactor 1                                                        |
| NLK         | 17q11.2   | Nemo-like kinase                                                        |
| PDCD4       | 10q24     | Programmed cell death 4 (neoplastic transformation inhibitor)           |
| PIP4K2A     | 10p12.2   | Phosphatidylinositol-5-phosphate 4-kinase, type II, alpha               |
| PRKCQ       | 10p15     | Protein kinase C, theta                                                 |
| PTEN        | 10q23.3   | Phosphatase and tensin homolog 1                                        |
| SGMS1       | 10q11.2   | Sphingomyelin synthase 1                                                |
| SIAH1       | 16q12     | Seven in absentia homolog 1                                             |
| VRK3        | 19q13     | Vaccinia related kinase 3                                               |
| CISD1       | 10q21.1   | CDGSH iron sulfur domain 1                                              |

**Supplementary Table S2. A list of Primer Sequences**

A. List of all the primer sequences that were used for real-time PCR.

| Real-Time PCR Primers | Sequence                                 |
|-----------------------|------------------------------------------|
| Sox2 Forward          | 5' – TGT AGA TTG CAG GCA GAC AGA - 3'    |
| Sox2 Reverse          | 5' – TGG GAA GAA GAT CAC GAA G – 3'      |
| Nanog Forward         | 5' – CTA AGA GGT GGC AGA AAA ACA - 3'    |
| Nanog Reverse         | 5' – CTG GTG GTA GGA AGA GTA AAG G - 3'  |
| CTNNB1 Forward        | 5' – CAT CTA CAC AGT TTG ATG CTG CT - 3' |
| CTNNB1 Reverse        | 5' – GCA GTT TTG TCA GTT CAG GGA - 3'    |
| MYC Forward           | 5' – GGC TCC TGG CAA AAG GTC A - 3'      |
| MYC Reverse           | 5' – CTG CGT AGT TGT GCT GAT GT - 3'     |
| FOSL1 Forward         | 5' – CAG GCG GAG ACT GAC AAA CTG – 3'    |
| FOSL1 Reverse         | 5' – TCC TTC CGG GAT TTT GCA GAT – 3'    |
| DKK1 Forward          | 5' – CCT TGA ACT CGG TTC TCA ATT CC – 3' |
| DKK1 Reverse          | 5' – CAA TGG TCT GGT ACT TAT TCC CG – 3' |
| JUN Forward           | 5' – TCC AAG TGC CGA AAA AGG AAG – 3'    |
| JUN Reverse           | 5' – CGA GTT CTG AGC TTT CAA GGT – 3'    |
| BTRC Forward          | 5' – CCA GAC TCT GCT TAA ACC AAG AA – 3' |
| BTRC Reverse          | 5' – GGG CAC AAT CAT ACT GGA AGT G - 3'  |
| PITX2 Forward         | 5' – CGG CAG CGG ACT CAC TTT A – 3'      |
| PITX2 Reverse         | 5' – GTT GGT CCA CAC AGC GAT TT – 3'     |
| CASP1 Forward         | 5' – TTT CCG CAA GGT TCG ATT TTC A – 3'  |
| CASP1 Reverse         | 5' – GGC ATC TGC GCT CTA CCA TC – 3'     |
| TRADD Forward         | 5' – GCT GTT TGA GTT GCA TCC TAG C – 3'  |
| TRADD Reverse         | 5' – CCG CAC TTC AGA TTT CGC A – 3'      |
| TLR2 Forward          | 5' – ATC CTC CAA TCA GGC TTC TCT – 3'    |
| TLR2 Reverse          | 5' – GGA CAG GTC AAG GCT TTT TAC A – 3'  |
| RELB Forward          | 5' – CCA TTG AGC GGA AGA TTC AAC T – 3'  |
| RELB Reverse          | 5' – CTG CTG GTC CCG ATA TGA GG – 3'A    |
| TOP2A Forward         | 5' – ACC ATT GCA GCC TGT AAA TGA – 3'    |
| TOP2A Reverse         | 5' – GGG CGG AGC AAA ATA TGT TCC – 3'    |
